# Supplementary material for: Homocoupling of aryl halides in flow: Space integration of lithiation and FeCl3 promoted homocoupling
Source: PubMed Central journal article supplement (PMC3170206; doi:10.3762/bjoc.7.122), 2011-08-02
Supplement: Beilstein_J_Org_Chem-07-1064-s001.pdf [file Beilstein_J_Org_Chem-07-1064-s001.pdf]

## **Supporting Information**

for

### **Homocoupling of aryl halides in flow: Space integration of lithiation and FeCl<sub>3</sub> promoted homocoupling**

Aiichiro Nagaki, Yuki Uesugi, Yutaka Tomida, and Jun-ichi Yoshida\*

Address: Department of Synthetic Chemistry and Biological Chemistry, Graduate School of Engineering, Kyoto University, Kyotodaigakukatsura, Nishikyo-ku, Kyoto, 615-8510, Japan

Email: Jun-ichi Yoshida\* - yoshida@sbchem.kyoto-u.ac.jp

\* Corresponding author

### **Experimental details**

## General

GC analysis was performed on a SHIMADZU GC-2014 gas chromatograph equipped with a flame ionization detector using a fused silica capillary column (column, CBP1; 0.25 mm x 25 m; initial oven temperature, 50 °C; rate of temperature increase, 10 °C/min). <sup>1</sup>H and <sup>13</sup>C NMR spectra were recorded on Varian MERCURYplus-400 (<sup>1</sup>H 400 MHz, <sup>13</sup>C 100 MHz) spectrometer with Me<sub>4</sub>Si or CDCl<sub>3</sub> as a standard in CDCl<sub>3</sub> unless otherwise noted. THF was purchased from Kanto Chemical Co., Inc. as a dry solvent and used without further purification. Hexane was purchased from Wako, distilled before use, and stored over molecular sieves (4 Å). *p*-Bromoanisole, *m*-bromoanisole, *o*-bromoanisole, *p*-bromobenzonitrile, *m*-bromobenzonitrile, *o*-bromobenzonitrile, *p*-iodonitrobenzene, *o*-iodonitrobenzene, methanol, iron (III) chloride and organolithium reagents were commercially available. Stainless steel (SUS304) T-shaped micromixer with inner diameter of 250 and 500 μm was manufactured by Sanko Seiki Co., Inc. Stainless steel (SUS316) microtube reactors with inner diameter of 250, 500 and 1000 μm were purchased from GL Sciences and were cut into appropriate lengths (3.5, 6, 12.5, 25, 50, 100, 200 and 400 cm). The micromixers and the microtube reactors were connected with stainless steel fittings (GL Sciences, 1/16 OUN). The flow microreactor system was dipped in a cooling bath to control the temperature. Harvard Model 11, equipped with gastight syringes purchased from SGE was used to introduce the solution into a flow microreactor system. After a steady state was reached, the product solution was collected for 30 s. The products can be obtained on a preparative scale with longer collection times.

## Br-Li Exchange Reaction of *p*-Bromoanisole Followed by the Reaction with Methanol in Flow Microreactor Systems

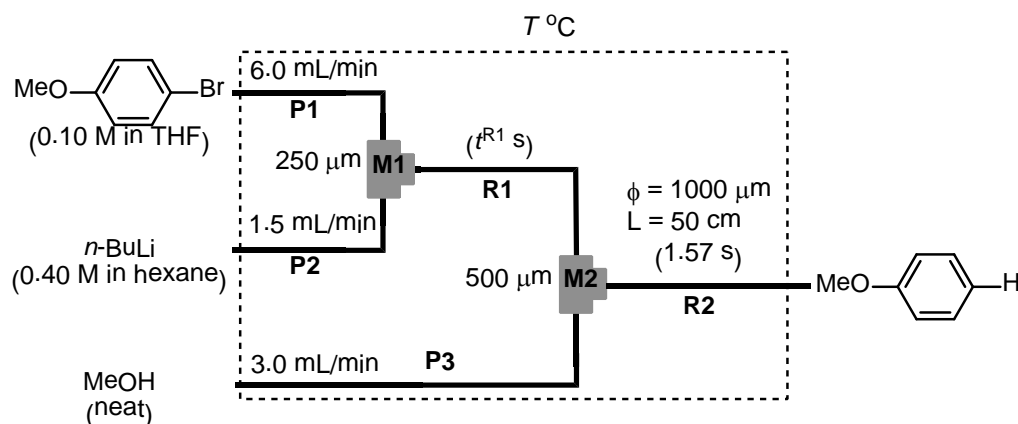

A flow microreactor system consisting of two T-shaped micromixers (**M1** and **M2**), two microtube reactors (**R1** and **R2**) and three tube pre-cooling units (**P1** (inner diameter  $\phi = 1000$   $\mu\text{m}$ , length  $L = 100$  cm), **P2** ( $\phi = 1000$   $\mu\text{m}$ ,  $L = 50$  cm) and **P3** ( $\phi = 1000$   $\mu\text{m}$ ,  $L = 100$  cm)) was used. A solution of *p*-bromoanisole (0.10 M in THF) (flow rate: 6.0 mL min<sup>-1</sup>) and a solution of *n*-butyllithium (0.40 M in hexane) (flow rate: 1.5 mL min<sup>-1</sup>) were introduced to **M1** ( $\phi = 250$   $\mu\text{m}$ ) by syringes pumps. The resulting solution was passed through **R1** ( $t^{R1}$  s) and was mixed with a solution of methanol (neat) (flow rate: 3.0 mL min<sup>-1</sup>) in **M2** ( $\phi = 500$   $\mu\text{m}$ ). The resulting solution was passed through **R2** ( $\phi = 1000$   $\mu\text{m}$ ,  $L = 50$  cm). The reactions were carried with varying residence time ( $t^{R1}$ : 0.22 ~ 6.3 s) and temperature ( $T$ : -78 ~ 24 °C). The yield of anisole was determined by GC. The results are summarized in Table S1.

**Table S1:** Br-Li Exchange Reaction of *p*-Bromoanisole Followed by the Reaction with Methanol in Flow Microreactor Systems

| temperature (°C) | inner diameter of <b>R1</b> (μm) | length of <b>R1</b> (cm) | residence time in <b>R1</b> | yield (%) |
|------------------|----------------------------------|--------------------------|-----------------------------|-----------|
| 24               | 1000                             | 3.5                      | 0.22                        | 82        |
|                  | 1000                             | 6.0                      | 0.38                        | 86        |
|                  | 1000                             | 12.5                     | 0.79                        | 85        |
|                  | 1000                             | 25                       | 1.6                         | 86        |
|                  | 1000                             | 50                       | 3.1                         | 88        |
|                  | 1000                             | 100                      | 6.3                         | 83        |
| 0                | 1000                             | 3.5                      | 0.22                        | 83        |
|                  | 1000                             | 6.0                      | 0.38                        | 84        |
|                  | 1000                             | 12.5                     | 0.79                        | 84        |
|                  | 1000                             | 25                       | 1.6                         | 84        |
|                  | 1000                             | 50                       | 3.1                         | 85        |
|                  | 1000                             | 100                      | 6.3                         | 88        |
| -18              | 1000                             | 3.5                      | 0.22                        | 77        |
|                  | 1000                             | 6.0                      | 0.38                        | 83        |
|                  | 1000                             | 12.5                     | 0.79                        | 85        |
|                  | 1000                             | 25                       | 1.6                         | 85        |
|                  | 1000                             | 50                       | 3.1                         | 86        |
|                  | 1000                             | 100                      | 6.3                         | 86        |
| -28              | 1000                             | 3.5                      | 0.22                        | 72        |
|                  | 1000                             | 6.0                      | 0.38                        | 87        |
|                  | 1000                             | 12.5                     | 0.79                        | 90        |
|                  | 1000                             | 25                       | 1.6                         | 90        |
|                  | 1000                             | 50                       | 3.1                         | 88        |
|                  | 1000                             | 100                      | 6.3                         | 89        |
| -38              | 1000                             | 3.5                      | 0.22                        | 65        |
|                  | 1000                             | 6.0                      | 0.38                        | 73        |
|                  | 1000                             | 12.5                     | 0.79                        | 86        |
|                  | 1000                             | 25                       | 1.6                         | 84        |
|                  | 1000                             | 50                       | 3.1                         | 87        |
|                  | 1000                             | 100                      | 6.3                         | 85        |
| -48              | 1000                             | 3.5                      | 0.22                        | 66        |
|                  | 1000                             | 6.0                      | 0.38                        | 67        |
|                  | 1000                             | 12.5                     | 0.79                        | 87        |
|                  | 1000                             | 25                       | 1.6                         | 88        |
|                  | 1000                             | 50                       | 3.1                         | 88        |
|                  | 1000                             | 100                      | 6.3                         | 90        |
| -58              | 1000                             | 3.5                      | 0.22                        | 45        |
|                  | 1000                             | 6.0                      | 0.38                        | 45        |
|                  | 1000                             | 12.5                     | 0.79                        | 77        |
|                  | 1000                             | 25                       | 1.6                         | 84        |
|                  | 1000                             | 50                       | 3.1                         | 92        |
|                  | 1000                             | 100                      | 6.3                         | 90        |

|     |      |      |      |    |
|-----|------|------|------|----|
| -68 | 1000 | 3.5  | 0.22 | 29 |
|     | 1000 | 6.0  | 0.38 | 44 |
|     | 1000 | 12.5 | 0.79 | 63 |
|     | 1000 | 25   | 1.6  | 84 |
|     | 1000 | 50   | 3.1  | 85 |
|     | 1000 | 100  | 6.3  | 85 |
| -78 | 1000 | 3.5  | 0.22 | 12 |
|     | 1000 | 6.0  | 0.38 | 17 |
|     | 1000 | 12.5 | 0.79 | 62 |
|     | 1000 | 25   | 1.6  | 67 |
|     | 1000 | 50   | 3.1  | 84 |
|     | 1000 | 100  | 6.3  | 83 |

### Oxidative Homocoupling Reaction of *p*-Methoxyphenyllithium Using FeCl<sub>3</sub> in an Integrated Flow Microreactor System

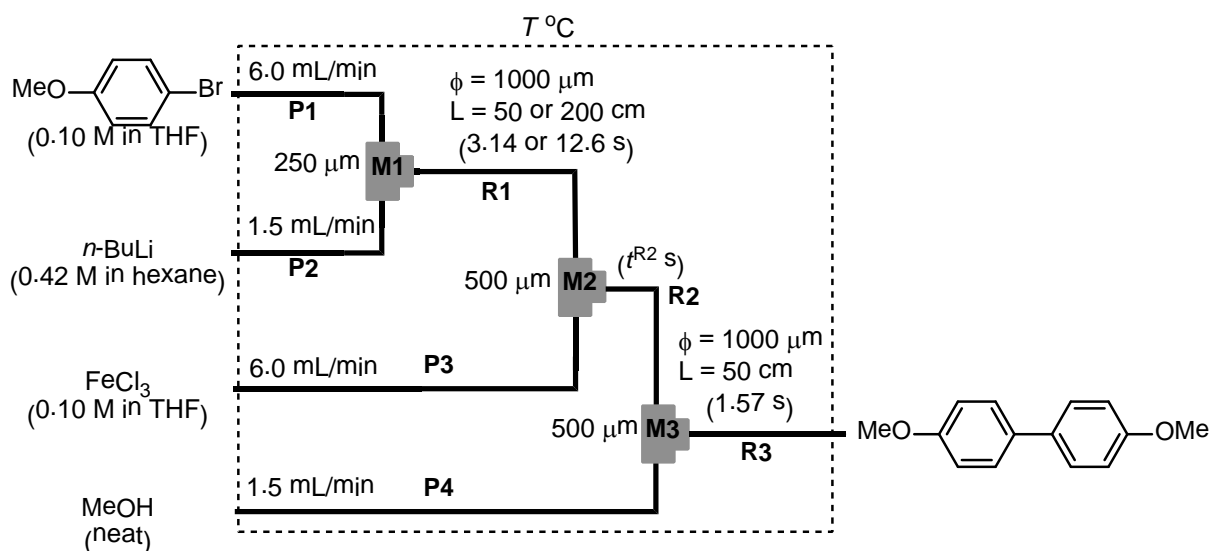

An integrated flow microreactor system consisting of three T-shaped micromixers (**M1**, **M2** and **M3**), three microtube reactors (**R1**, **R2** and **R3**) and four tube pre-cooling units (**P1** (inner diameter  $\phi = 1000 \mu\text{m}$ , length  $L = 100 \text{ cm}$ ), **P2** ( $\phi = 1000 \mu\text{m}$ ,  $L = 50 \text{ cm}$ ) and **P3** ( $\phi = 1000 \mu\text{m}$ ,  $L = 100 \text{ cm}$ ), **P4** ( $\phi = 1000 \mu\text{m}$ ,  $L = 50 \text{ cm}$ )) was used. A solution of *p*-bromoanisole (0.10 M in THF) (flow rate:  $6.0 \text{ mL min}^{-1}$ ) and a solution of *n*-butyllithium (0.42 M in hexane) (flow rate:  $1.5 \text{ mL min}^{-1}$ ) were introduced to **M1** ( $\phi = 250 \mu\text{m}$ ) by syringe pumps. The resulting solution was passed through **R1** ( $\phi = 1000 \mu\text{m}$ ,  $L = 50 \text{ cm}$  ( $T = 24, 0$  and  $-28 \text{ }^\circ\text{C}$ ) or  $200 \text{ cm}$  ( $T = -48$  and  $-78 \text{ }^\circ\text{C}$ )) and was mixed with a solution of FeCl<sub>3</sub> (0.10 M

in THF) (flow rate: 6.0 mL min<sup>-1</sup>) in **M2** ( $\phi = 500 \mu\text{m}$ ). The resulting solution was passed through **R2** ( $t^{\text{R2}}$  s) and was mixed with methanol (flow rate: 1.5 mL min<sup>-1</sup>) in **M3** ( $\phi = 500 \mu\text{m}$ ). The resulting solution was passed through **R3** ( $\phi = 1000 \mu\text{m}$ , L = 50 cm). After a steady state was reached, the product solution was collected for 30 s. The reactions were carried with varying residence time ( $t^{\text{R2}}$ : 0.22 ~ 3.1 s) and temperature ( $T$ : -78 ~ 24 °C). The yield of 4,4'-dimethoxybiphenyl was determined by GC. The results are summarized in Table S2. In the case of  $t^{\text{R2}} = 3.1$  s at 24 °C, sat. NH<sub>4</sub>Cl solution (2 mL) was added and the organic materials were extracted with Et<sub>2</sub>O (25 mL×3). The combined organic extracts were dried over Na<sub>2</sub>SO<sub>4</sub> and concentrated. The crude product was purified by column chromatography to give 4,4'-dimethoxybiphenyl (21.7 mg, 68%) (Figure S1, S2).

**Table S2:** Oxidative Homocoupling Reaction of *p*-Methoxyphenyllithium Using FeCl<sub>3</sub> in an Integrated Flow Microreactor System

| temperature (°C) | inner diameter of <b>R2</b> ( $\mu\text{m}$ ) | length of <b>R2</b> (cm) | residence time in <b>R2</b> (s) | condition | yield (%) |
|------------------|-----------------------------------------------|--------------------------|---------------------------------|-----------|-----------|
| 24               | 1000                                          | 3.5                      | 0.22                            | A         | 67        |
|                  | 1000                                          | 6.0                      | 0.38                            |           | 72        |
|                  | 1000                                          | 50                       | 0.79                            |           | 72        |
|                  | 1000                                          | 100                      | 1.6                             |           | 71        |
|                  | 1000                                          | 200                      | 3.1                             |           | 65        |
| 0                | 1000                                          | 3.5                      | 0.22                            | A         | 61        |
|                  | 1000                                          | 6.0                      | 0.38                            |           | 72        |
|                  | 1000                                          | 50                       | 0.79                            |           | 73        |
|                  | 1000                                          | 100                      | 1.6                             |           | 73        |
|                  | 1000                                          | 200                      | 3.1                             |           | 69        |
| -28              | 1000                                          | 3.5                      | 0.22                            | A         | 53        |
|                  | 1000                                          | 6.0                      | 0.38                            |           | 63        |
|                  | 1000                                          | 50                       | 0.79                            |           | 66        |
|                  | 1000                                          | 100                      | 1.6                             |           | 71        |
|                  | 1000                                          | 200                      | 3.1                             |           | 69        |
| -48              | 1000                                          | 3.5                      | 0.22                            | B         | 45        |
|                  | 1000                                          | 6.0                      | 0.38                            |           | 59        |
|                  | 1000                                          | 50                       | 0.79                            |           | 67        |
|                  | 1000                                          | 100                      | 1.6                             |           | 74        |
|                  | 1000                                          | 200                      | 3.1                             |           | 71        |

|     |      |     |      |   |    |
|-----|------|-----|------|---|----|
| -78 | 1000 | 3.5 | 0.22 | B | 21 |
|     | 1000 | 6.0 | 0.38 |   | 22 |
|     | 1000 | 50  | 0.79 |   | 23 |
|     | 1000 | 100 | 1.6  |   | 35 |
|     | 1000 | 200 | 3.1  |   | 51 |

Condition A: **R1** ( $\phi = 1000 \mu\text{m}$ ,  $L = 50 \text{ cm}$ , 3.14 s), Condition B: **R1** ( $\phi = 1000 \mu\text{m}$ ,  $L = 200 \text{ cm}$ , 12.6 s)

### Typical Procedure for Oxidative Homocoupling Reaction of Various Aryllithiums Using $\text{FeCl}_3$ in an Integrated Flow Microreactor System

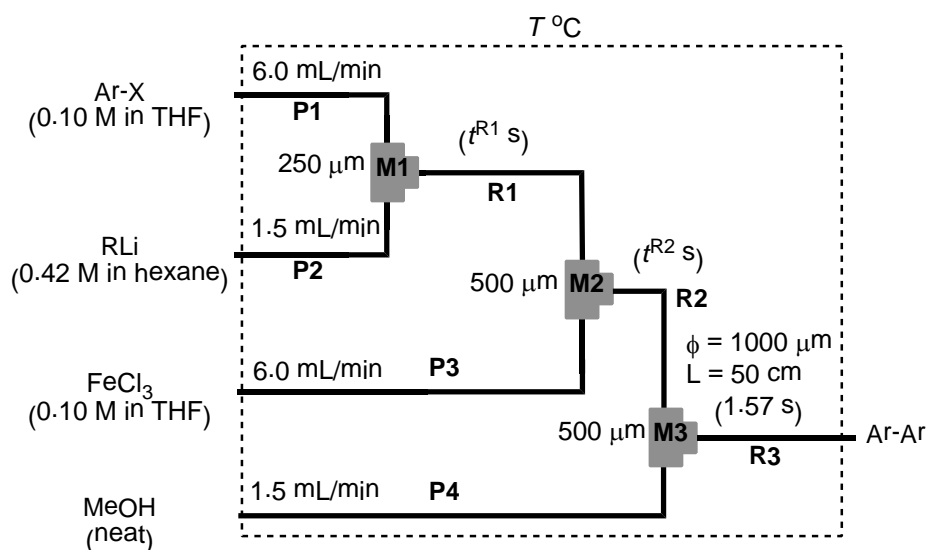

An integrated flow microreactor system consisting of three T-shaped micromixers (**M1**, **M2** and **M3**), three microtube reactors (**R1**, **R2** and **R3**) and four tube pre-cooling units (**P1** (inner diameter  $\phi = 1000 \mu\text{m}$ , length  $L = 100 \text{ cm}$ ), **P2** ( $\phi = 1000 \mu\text{m}$ ,  $L = 50 \text{ cm}$ ) and **P3** ( $\phi = 1000 \mu\text{m}$ ,  $L = 100 \text{ cm}$ ), **P4** ( $\phi = 1000 \mu\text{m}$ ,  $L = 50 \text{ cm}$ )) was used. A solution of aryl halides ( $\text{ArX}$ ) (0.10 M in THF) (flow rate:  $6.0 \text{ mL min}^{-1}$ ) and a solution of lithium reagents (0.42 M) (flow rate:  $1.5 \text{ mL min}^{-1}$ ) were introduced to **M1** ( $\phi = 250 \mu\text{m}$ ) by syringe pumps. The resulting solution was passed through **R1** ( $t^{\text{R1}}$  s) and was mixed with a solution of  $\text{FeCl}_3$  (0.10 M in THF) in **M2** ( $\phi = 500 \mu\text{m}$ ). The resulting solution was passed through **R2** ( $\phi = 1000 \mu\text{m}$ ) ( $t^{\text{R2}}$  s) was mixed with methanol (neat) (flow rate:  $1.5 \text{ mL min}^{-1}$ ) in **M3** ( $\phi = 500 \mu\text{m}$ ). The resulting solution was passed through **R3** ( $\phi = 1000 \mu\text{m}$ ,  $L = 50 \text{ cm}$ ). After a steady state was reached, the product solution was collected for 30 s. The yield of homocoupling products was

determined by GC. The results are summarized in Table S3. The spectral data of all homocoupling products were identical to those of commercially available compounds.

**Table S3:** Typical Procedure for Oxidative Homocoupling Reaction of Various Aryllithium Using FeCl<sub>3</sub> in an Integrated Flow Microreactor System

| Ar-X                        | lithium reagent | inner diameter of <b>R1</b> (μm) | length of <b>R1</b> (cm) | residence time in <b>R1</b> (s) | length of <b>R2</b> (cm) | residence time in <b>R2</b> (s) | temperature (°C) | yield (%) |
|-----------------------------|-----------------|----------------------------------|--------------------------|---------------------------------|--------------------------|---------------------------------|------------------|-----------|
| <i>m</i> -bromoanisole      | <i>n</i> -BuLi  | 1000                             | 50                       | 3.1                             | 50                       | 1.75                            | 24               | 69        |
| <i>o</i> -bromoanisole      | <i>n</i> -BuLi  | 1000                             | 50                       | 3.1                             | 200                      | 6.98                            | 0                | 76        |
| <i>p</i> -bromobenzonitrile | <i>n</i> -BuLi  | 500                              | 3.5                      | 0.055                           | 6                        | 0.209                           | -28              | 75        |
| <i>m</i> -bromobenzonitrile | <i>n</i> -BuLi  | 500                              | 3.5                      | 0.055                           | 50                       | 1.75                            | 0                | 66        |
| <i>o</i> -bromobenzonitrile | <i>n</i> -BuLi  | 500                              | 3.5                      | 0.055                           | 50                       | 1.75                            | 24               | 76        |
| <i>p</i> -iodonitrobenzene  | PhLi            | 250                              | 3.5                      | 0.014                           | 200                      | 6.98                            | -48              | 53        |
| <i>o</i> -iodonitrobenzene  | PhLi            | 250                              | 3.5                      | 0.014                           | 50                       | 1.75                            | -48              | 63        |

**3,3'-dimethoxybiphenyl:** Obtained in 69% yield (GC *t*<sub>R</sub> 23.9 min) from *m*-bromoanisole.

**2,2'-dimethoxybiphenyl:** Obtained in 76% yield (GC *t*<sub>R</sub> 21.5 min) from *o*-bromoanisole.

**1,1'-biphenyl-4,4'-dicarbonitrile:** Obtained in 75% yield (GC *t*<sub>R</sub> 26.0 min) from *p*-bromobenzonitrile.

**1,1'-biphenyl-3,3'-dicarbonitrile:** Obtained in 66% yield (GC *t*<sub>R</sub> 25.6 min) from *m*-bromobenzonitrile.

**1,1'-biphenyl-2,2'-dicarbonitrile:** Obtained in 76% yield (GC *t*<sub>R</sub> 23.5 min) from *o*-bromobenzonitrile.

**4,4'-dinitrobiphenyl:** Obtained in 53% yield (GC *t*<sub>R</sub> 28.5 min) from *p*-iodonitrobenzene.

**2,2'-dinitrobiphenyl:** Obtained in 63% yield (GC *t*<sub>R</sub> 25.6 min) from *o*-iodonitrobenzene.



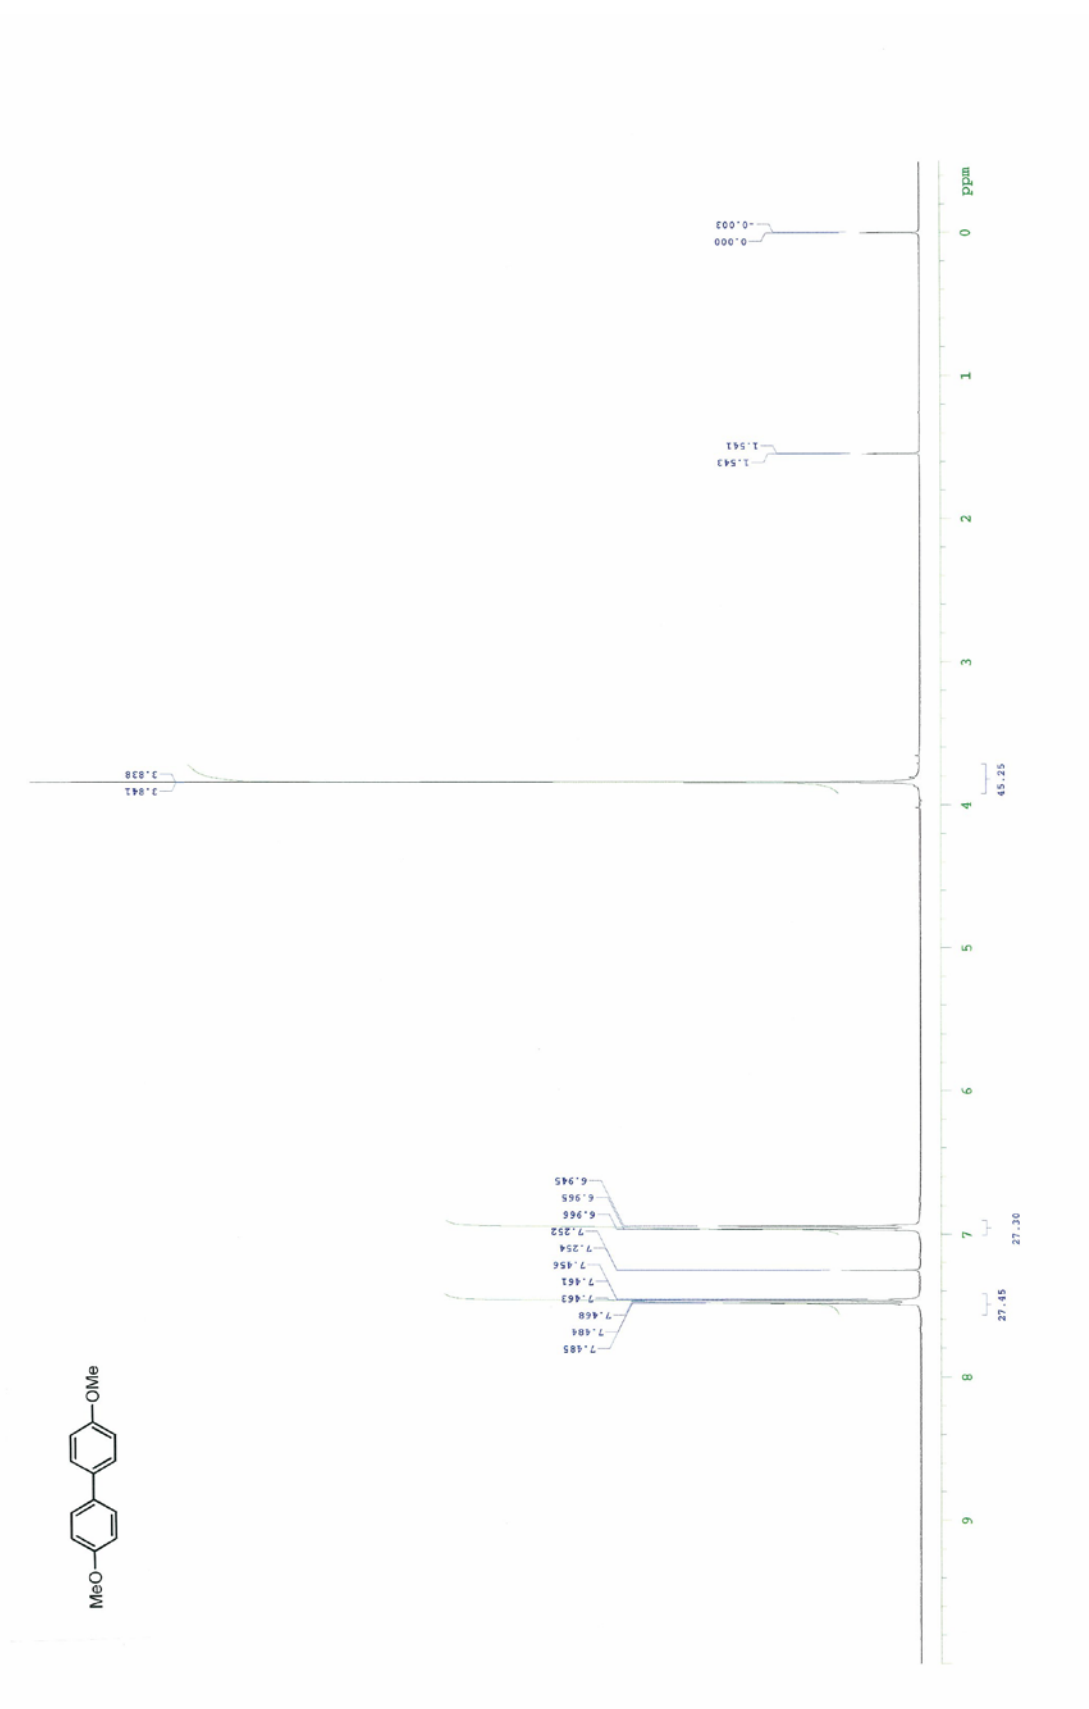

**Figure S1:** <sup>1</sup>H NMR spectrum of 4,4'-dimethoxybiphenyl.

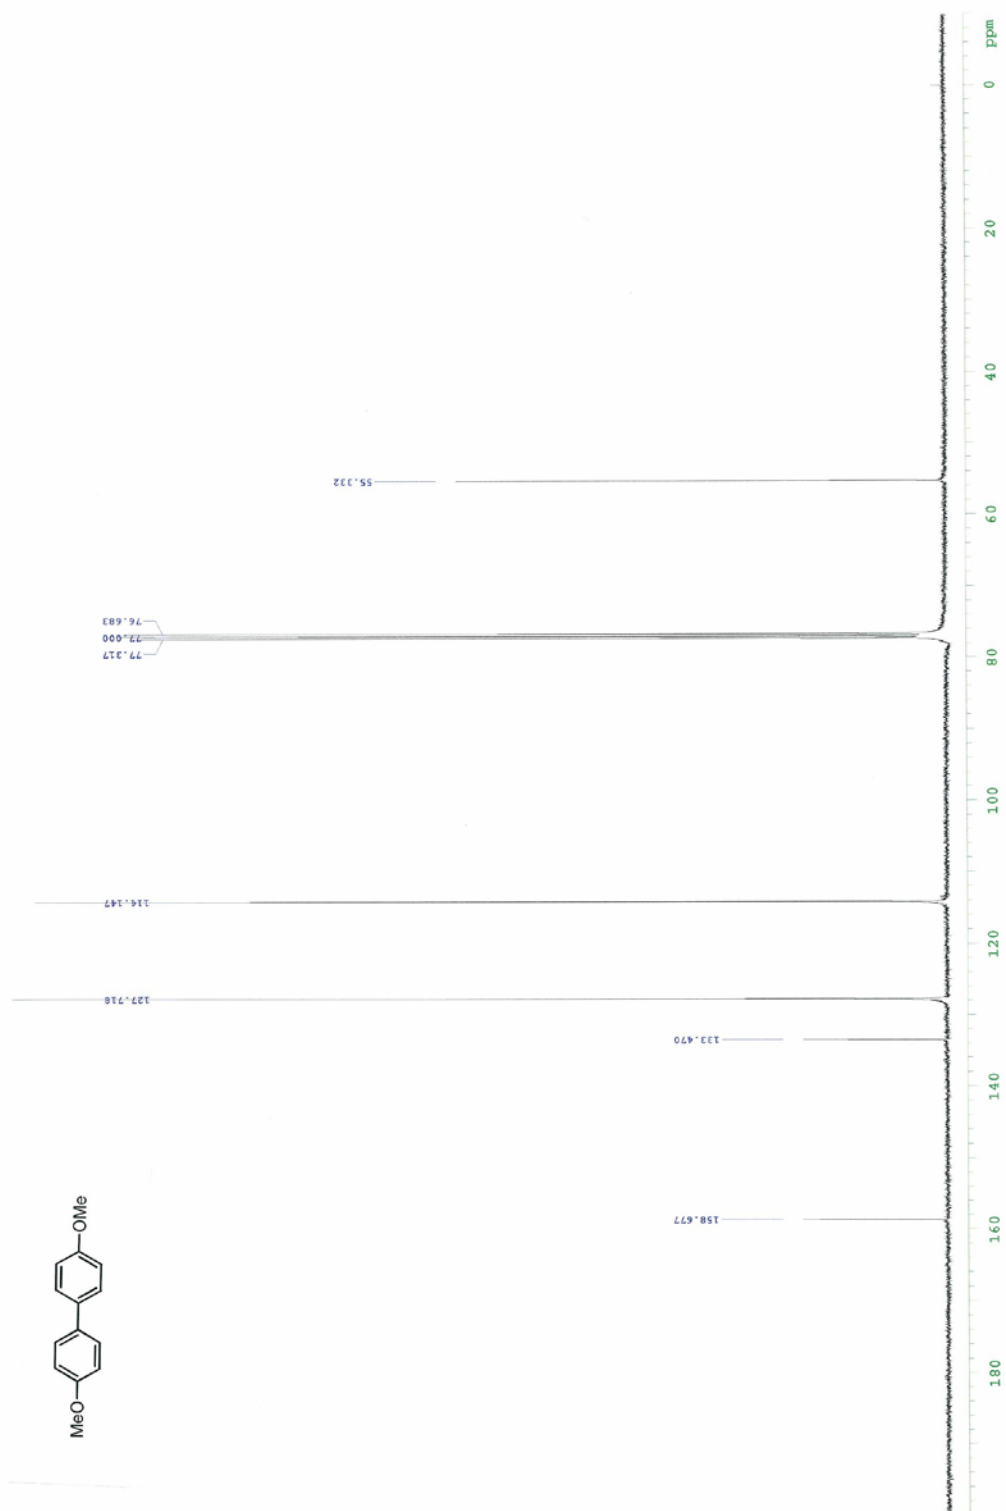

**Figure S2:**  $^{13}\text{C}$  NMR spectrum of 4,4'-dimethoxybiphenyl.
